# Supplementary material for: TRIB3 Promotes the Proliferation and Invasion of Renal Cell Carcinoma Cells via Activating MAPK Signaling Pathway
Source: PubMed Central journal article supplement — Int J Biol Sci. 2019 Jan 1;15(3):587–97. doi: 10.7150/ijbs.29737 (PMC6367588; doi:10.7150/ijbs.29737), 2019-01-01
Supplement: ijbsv15p0587s1.pdf [file ijbsv15p0587s1.pdf]

Figure S1

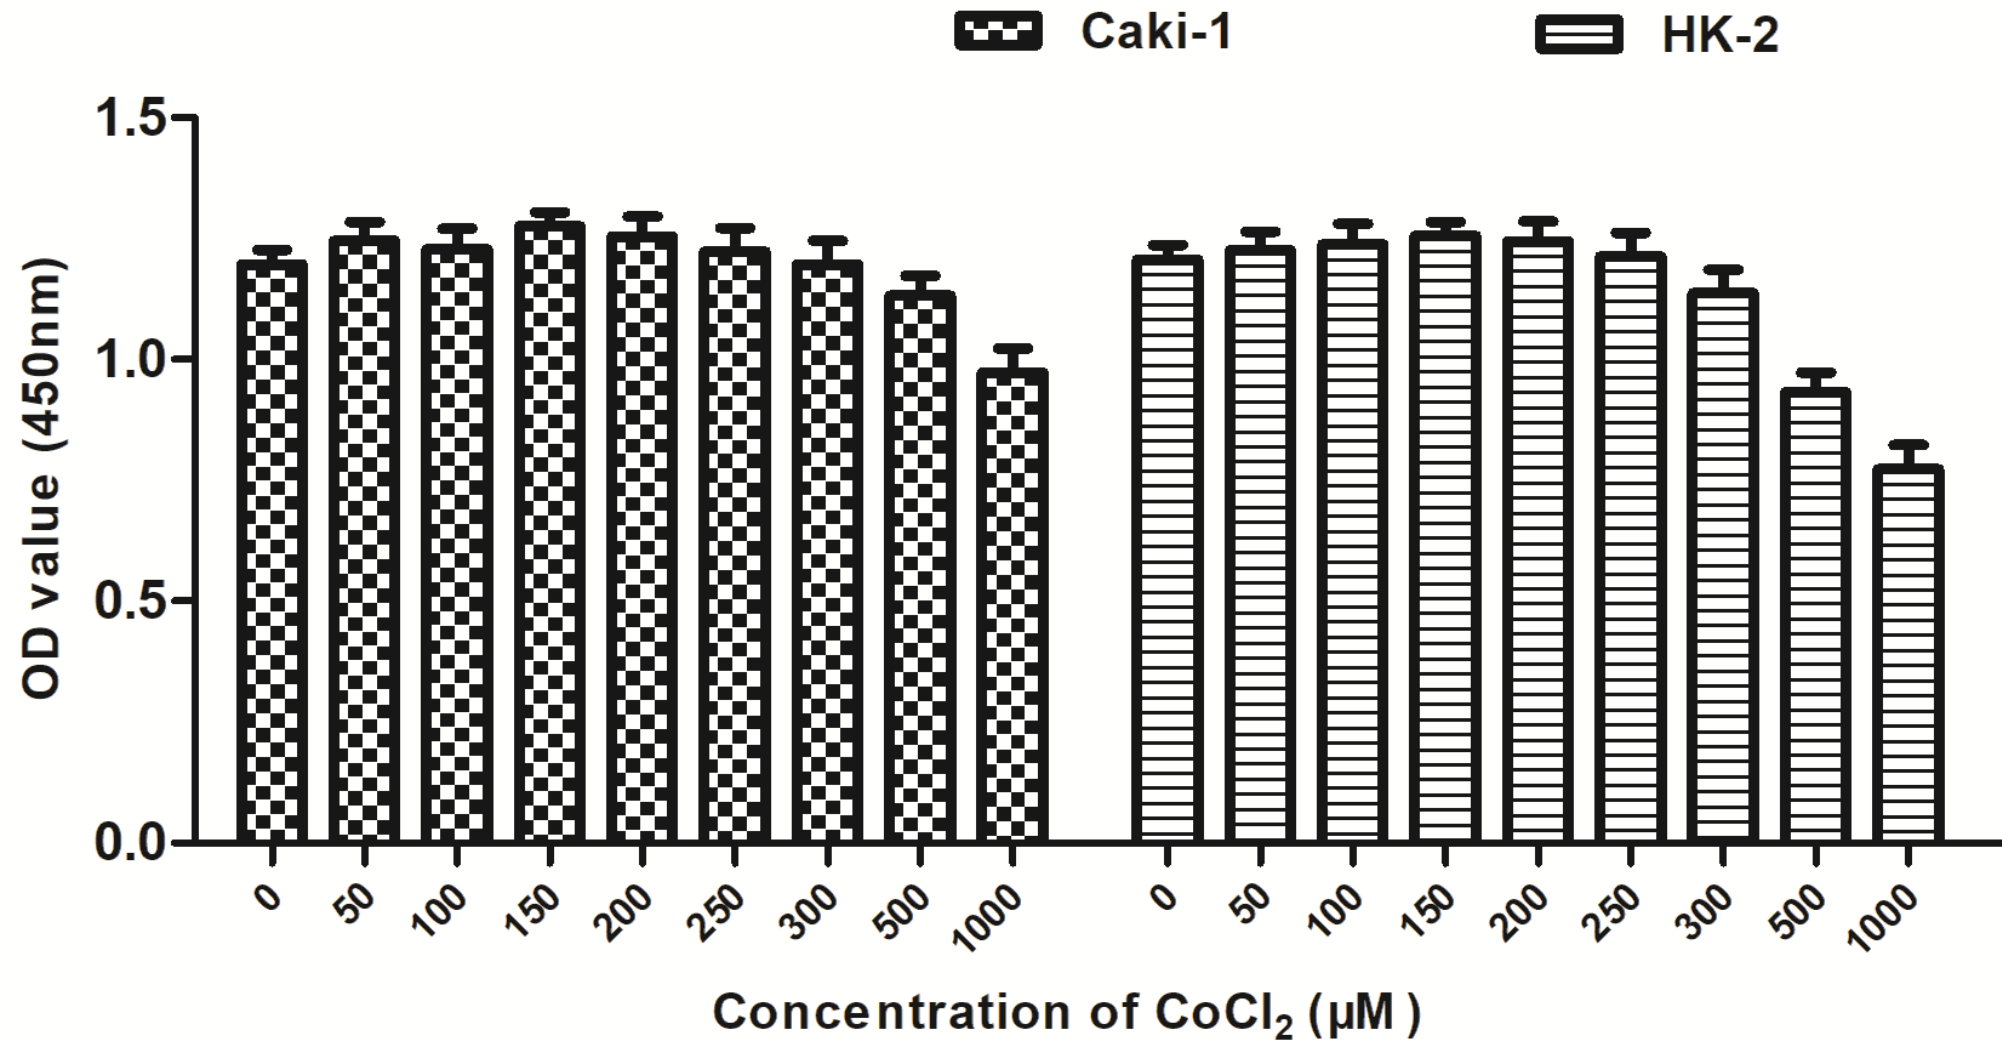

# Knock-down of TRIB3 (LV-shTRIB3) and the non-targeting control lentivirus (LV-scrambled)

- siRNA design:

| Target Seq               | GC%    |
|--------------------------|--------|
| GATGACA ACTTAGATACC<br>G | 42.11% |

- Vector: GV248

- Vector elements: hU6-MCS-Ubiquitin-EGFP-IRES-puromycin

- Vector map: <http://www.genechem.com.cn/Zaiti.aspx?zt=GV248>

- Sequence of non-targeting control: TTCTCCGAACGTGTCACGT

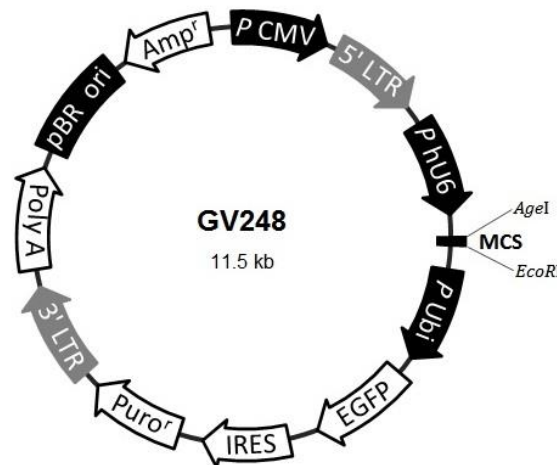

# Knock-down of TRIB3 (LV-shTRIB3) and the non-targeting control lentivirus (LV-scrambled)

## - Oligo information :

| NO.                   | 5'         | STEM                   | Loop   | STEM                  | 3'     |
|-----------------------|------------|------------------------|--------|-----------------------|--------|
| TRIB3-RNAi(15423-1)-a | Ccgg       | tgGATGACAACCTTAGATACCG | CTCGAG | CGGTATCTAAGTTGTCATCCA | TTTTTg |
| TRIB3-RNAi(15423-1)-b | aattcaaaaa | tgGATGACAACCTTAGATACCG | CTCGAG | CGGTATCTAAGTTGTCATCCA |        |

## - Sequencing of LV-shTRIB3 :

TACAAAAACAAATTACAAAAATTCAAAATTTTCGGGTTTATTACAGGGACAGCAGAGATCCAGTTTGGTTAATTAATCGAGCGGCCGCCCCCT  
 TCACCGAGGGCCTATTTCCCATGATTCCTTCATATTTGCATATACGATACAAGGCTGTTAGAGAGATAATTGGAATTAATTTGACTGTAAACACA  
 AAGATATTAGTACAAAATACGTGACGTAGAAAGTAATAATTTCTTGGGTAGTTTGCAGTTTTAAAATTATGTTTTAAAATGGACTATCATATGCTTA  
 CCGTAACTTGAAAGTATTTTCGATTTCTTGGCTTTATATATCTTGTGGAAAGGACGAAACA **CCGGTGGATGACAACCTTAGATACCGCTCGAGCG**  
**GTATCTAAGTTGTCATC**cATTTTTGAATTCTCGACCTCGAGACAAATGGCAGTATTCATCCACGGATCCTAACCCGTGTCGGCTCCAGATCTG  
 GCCTCCGCGCCGGGTTTTGGCGCCTCCCGCGGGCGCCCCCTCCTCACGGCGAGCGCTGCCACGTCAGACGAAGGGGCGCAGCGAGCG  
 TCCTGATCCTTCCGCCCCGGACGCTCAGGACAGCGGCCCGCTGCTCATAAGACTCGGCCTTAGAACCCAGTATCAGCAGAAGGACATTTTA  
 GGACGGGACTTGGGTGACTCTAGGGCACTGGTTTTCTTTCCAGAGAGCGGAACAGGCGAGGAAAAGTAGTCCCTTCTCGGCGATTCTGCG  
 GAGGGATCTCCGTGGGGCGGTGAACGCCGATGATTATATAAGGACGCGCCGGGTGTGGCACAGCTAGTTCCGTCGCAGCCGGGATTTGG  
 GTCGCGgTTCTTGTGGTGGATCGCTGTGATCGTCACTTGTGAGTAGCGGCTGCTGGCTGCCGGGCTTTCGTGCCGCCGGGGCCGCTCGTG  
 GGACGAAGCGTGTGAGAGACCGCCAAGGCTGTAGTCTGGGTCCGCGAGCAAGTTGCCCTGAACTGGGGTTGGGGGGGAGCGCAGCA

# Overexpression of TRIB3 (LV-TRIB3) and its negative control lentivirus (LV-control)

- **Vector:** GV492
- **Vector elements:** Ubi-MCS-3FLAG-CBh-gcGFP-IRES-puromycin
- **Vector map:** <http://www.genechem.com.cn/Zaiti.aspx?zt=GV492>

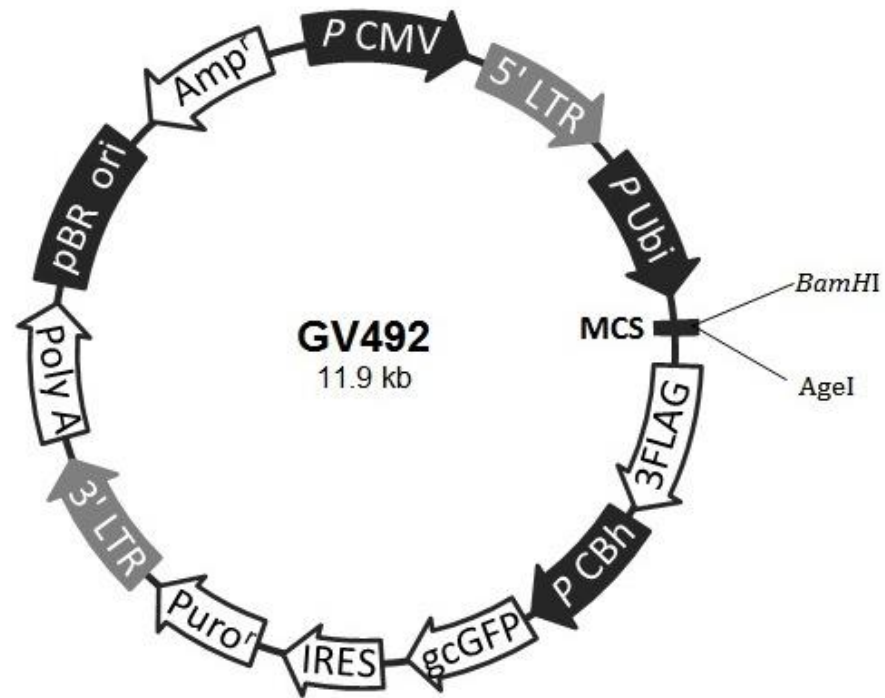

# Overexpression of TRIB3 (LV-TRIB3) and its negative control lentivirus (LV-control)

## - Sequencing of LV-TRIB3:

GGCCGTTTTTGGCTTTTTTGTAGACGAAGCTTGGGCTGCAGGTCGACTCTAGAGGGATCCCGCCACC**ATGCGAGCCACC**  
**CCTCTGGCTGCTCCTGCGGGTTCCTGTCCAGGAAGAAGCGGTTGGAGTTGGATGACA**ACTTAGATACCGAGCGTCCC  
**GTCCAGAAACGAGCTCGAAGTGGGCCCCAGCCAGACTGCCCCCTGCCTGTTGCCCTGAGCCCACCTACTGCTCCA**  
**GATCGTGCAACTGCTGTGGCCACTGCCTCCCGTCTTGGGCCCTATGTCCTCCTGGAGCCCGAGGAGGGCGGGCGGGCC**  
**TACCAGGCCCTGCACTGCCCTACAGGCACTGAGTATACCTGCAAGGTGTACCCCGTCCAGGAAGCCCTGGCCGTGCTG**  
**GAGCCCTATGCGCGGCTGCCCCCGCACAAGCATGTGGCTCGGCCCACTGAGGTCCTGGCTGGTACCCAGCTCCTCTAC**  
**GCCTTTTTCACTCGGACCCATGGGGACATGCACAGCCTGGTGCGAAGCCGCCACCGTATCCCTGAGCCTGAGGCTGCC**  
**GTGCTCTCCGCCAGATGGCCACCGCCCTGGCGCACTGTCACCAGCACGGTCTGGTCCTGCGTGATCTCAAGCTGTGT**  
**CGCTTTGTCTTCGCTGACCGTGAGAGGAAGAAGCTGGTGCTGGAGAACCTGGAGGACTCCTGCGTGCTGACTGGGCC**  
**AGATGATTCCCTGTGGGACAAGCACGCGTGCCCAGCCTACGTGGGACCTGAGATACTCAGCTCACGGGCCTCATACTC**  
**GGCAAGGCAGCCGATGTCTGGAGCCTGGGCGTGGCGCTCTTCACCATGCTGGCCGGCCACTACCCCTTCCAGGACTC**  
**GGAGCCTGTCCTGCTCTTCGGCAAGATCCGCCGCGGGGCCTACGCCTTGCCCTGCAGGCCTCTCGGCCCCTGCCCGCTG**  
**TCTGGTTCGCTGCCTCCTTCGTCGGGAGCCAGCTGAACGGCTCACAGCCACAGGCATCCTCCTGCACCCCTGGCTGCG**  
**ACAGGACCCGATGCCCTTAGCCCCAACCCGATCCCATCTCTGGGAGGCTGCCAGGTGGTCCCTGATGGACTGGGGCT**  
**GGACGAAGCCAGGGAAGAGGAGGGAGACAGAGAAGTGGTTCTGTATGGC**GGTATGGACTACAAGGATGACGA

**The red font is the insertion sequence, the black font is the vector sequence, and the underscore marks the enzyme cutting site**

## Overexpression of HIF-1 $\alpha$ (LV-HIF-1 $\alpha$ ) and its negative control lentivirus (LV-vector)

- **Vector:** GV358
- **Vector elements:** Ubi-MCS-3FLAG-SV40-EGFP-IRES-puromycin
- **Vector map:**

[http://www.genechem.com.cn/service/index.php?ac=gene&at=vector\\_search&keyword=GV358](http://www.genechem.com.cn/service/index.php?ac=gene&at=vector_search&keyword=GV358)

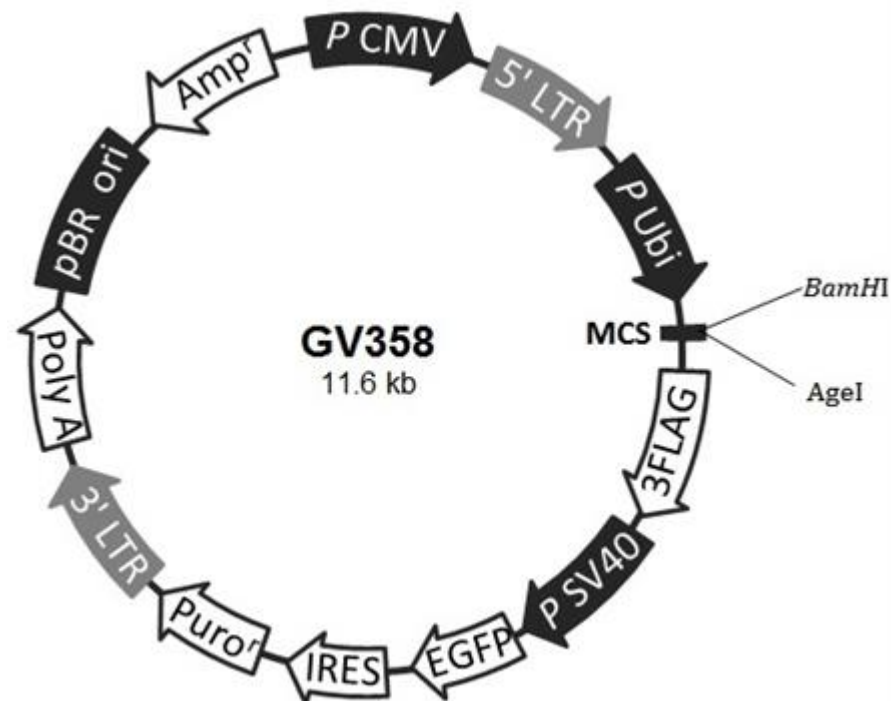

# Overexpression of HIF-1 $\alpha$ (LV-HIF-1 $\alpha$ ) and its negative control lentivirus (LV-vector)

## - Sequencing of LV-HIF-1 $\alpha$ :

GGCTTTTTTGTAGACGAAGCTTGGGCTGCAGGTCGACTCTAGAGGATCCCCGGGTACCGGTCGCCACCATGGAGGGCGCCGGCGGCGCGGAACGACAAGAAAAAGATAAGTTCTGAACGTCGAAAA  
GAAAAGTCTCGAGATGCAGCCAGATCTCGGCGAAGTAAAGAATCTGAAGTTTTTATGAGCTTGCTCATCAGTTGCCACTTCCACATAATGTGAGTTCGCATCTTGATAAGGCCTCTGTGATGAGGCTTA  
CCATCAGCTATTTGCGTGTGAGGAACTTCTGGATGCTGGTGATTTGGATATTGAAGATGACATGAAAGCACAGATGAATTGCTTTTATTTGAAAGCCTTGGATGGTTTTGTTATGGTTCTCACAGATGAT  
GGTGACATGATTTACATTTCTGATAATGTGAACAAATACATGGGATTAAGTCAAGTTTGAAGTAACTGGACACAGTGTGTTTACTCATCCATGTGACCATGAGGAAATGAGAGAAATGCTTACACA  
CAGAAATGGCCTTGTGAAAAAGGGTAAAGAACAACACACAGCGAAGCTTTTTCTCAGAATGAAGTGTACCCTAACTAGCCGAGGAAGAACTATGAACATAAAGTCTGCAACATGGAAGGTATTGC  
ACTGCACAGGCCACATTCACGTATATGATACCAACAGTAACCAACCTCAGTGTGGGTATAAGAAACCACCTATGACCTGCTTGGTGCTGATTTGTGAACCCATTCCCTCACCCATCAATATTGAAATTCCTT  
TAGATAGCAAGACTTTCCTCAGTCGACACAGCCTGGATATGAAATTTCTTATTGTGATGAAAGAATTACCGAATTGATGGGATATGAGCCAGAAGAACTTTTAGGCCGCTCAATTTATGAATATTATCATG  
CTTTGGACTCTGATCATCTGACCAAACTCATCATGATATGTTACTAAAGGACAAGTCACCACAGGACAGTACAGGATGCTTGCCAAAAGAGGTGGATATGTCTGGGTTGAAACTCAAGCAACTGTCAT  
ATATAACACCAAGAATTCTCAACCACAGTGCATTGTATGTGTAATTACGTTGTGAGTGGTATTATTACGACGACTTGATTTTCTCCCTTCAACAAACAGAATGTGTCCTTAAACCGGTTGAATCTTCAGA  
TATGAAAATGACTCAGCTATTCACCAAAGTTGAATCAGAAGATACAAGTAGCCTCTTTGACAAACTTAAAGAAGGAACCTGATGCTTTAACTTGGCTGGCCCCAGCCGCTGGAGACACAATCATATCTTTA  
GATTTTGGCAGCAACGACACAGAACTGATGACCAGCAACTTGAGGAAGTACCATTATATAATGATGTAATGCTCCCCTCACCAACGAAAAATTACAGAATATAAATTTGGCAATGTCTCCATTACCCAC  
CGCTGAAACGCCAAAGCCACTTCAAGTAGTGCTGACCCTGCACTCAATCAAGAAGTTGCATTAATAATTAGAACCAATCCAGAGTCACTGGAACCTTTCTTTTACCATGCCCCAGATTCCAGGATCAGACA  
CCTAGTCCTCCGATGGAAGCACTAGACAAAGTTCACTGAGCCTAATAGTCCCAGTGAATATTGTTTTATGTGGATAGTGATATGGTCAATGAATTCAAGTTGGAATTGGTAGAAAACTTTTTGCTGA  
AGACACAGAAGCAAAGAACCATTCTACTCAGGACACAGATTTAGACTTGGAGATGTTAGCTCCCTATATCCCAATGGATGATGACTTCCAGTTACGTTCCCTCGATCAGTTGTCACCATTAGAAAGCA  
GTTCCGCAAGCCCTGAAAGCGCAAGTCTCAAAGCACAGTTACAGTATTCCAGCAGACTCAAATACAAGAACCTACTGCTAATGCCACCACTACCACTGCCACCACTGATGAATTAACAAACAGTGACAA  
AAGACCGTATGGAAGACATTAATATTGATTGCATCTCCATCTCTACCCACATACATAAAGAACTACTAGTGCCACATCATCACCATATAGAGATACTCAAAGTCCGGACAGCCTCACCAAACAGAGCAG  
GAAAAGGAGTCATAGAACAGACAGAAAAATCTCATCAAGAAGCCCTAACGTGTTATCTGTGCTTTGAGTCAAAGAACTACAGTTCCTGAGGAAGAACTAAATCCAAAGATACTAGCTTTGCAGAATG  
CTCAGAGAAAGCGAAAAATGGAACATGATGGTTCACTTTTTCAAGCAGTAGGAATTGGAACATTATTACAGCAGCCAGACGATCATGCAGCTACTACATCACTTTCTTGAAACGTGTAAAAGGATGCA  
AATCTAGTGAACAGAATGGAATGGAGCAAAAGACAATTATTTAATACCCTCTGATTTAGCATGTAGACTGCTGGGGCAATCAATGGATGAAAGTGGATTACCACAGCTGACCAGTTATGATTGTGAAGT  
TAATGCTCCTATACAAGGCAGCAGAACTACTGCAGGGTGAAGAATTAAGGATCAAGTTAACGGTATGGACTACAAGGATGACGATGACAAGGATTACAAAGACGACGATGATAAGG  
ACTATAAGGATGATGACGACAAATGAGCTAGCCTGTGGAATGTGTGTCAGTTAGGGTGTGGAAAGTCCCAGGCTCCCAGCAGGCAGAAGTATGCAAAGCATGCATCTCAATTAGTCAGCAACCAGG  
TGTGGAAAGTCCCAGGCTCCCAGCAGGCAGAAGTATGCAAAGCATGCATCTCAATTAGTCAGCAACCATAGTCCCGCCCCTAACTCCGCCATCCCAGCCCTAACTCC

The red font is the insertion sequence, the black font is the vector sequence, and the underscore marks the enzyme cutting site
